# Supplementary material for: Enhanced two-photon absorption in hydrothermally synthesized La2O6Te nanorods for visible light photodetection
Source: Royal Society of Chemistry journal article supplement (doi:10.1039/d4nr04101a), 2024-12-09
Supplement: d4nr04101a1.pdf [file d4nr04101a1.pdf]

**Supporting Information**

# **Enhanced Two-Photon Absorption in Hydrothermally Synthesized $\text{La}_2\text{O}_6\text{Te}$ Nanorods for Visible Light Photo Detection**

Prabhukrupa Chinmay Kumar<sup>1</sup>, Swikruti Supriya<sup>1</sup>, Ashutosh Mohapatra<sup>1</sup>,  
Sripan Chinnaiyah<sup>2</sup>, Ramakanta Naik<sup>1\*</sup>

<sup>1</sup>*Department of Engineering and Materials Physics, Institute of Chemical Technology-Indian Oil  
Odisha Campus, Bhubaneswar, 751013, India*

<sup>2</sup>*Crystal Growth and Thin Film Laboratory, Department of Physics, Bharathidasan University,  
Tiruchirappalli-620024, Tamil Nadu, India*

*\*Corresponding authors: ramakanta.naik@gmail.com*

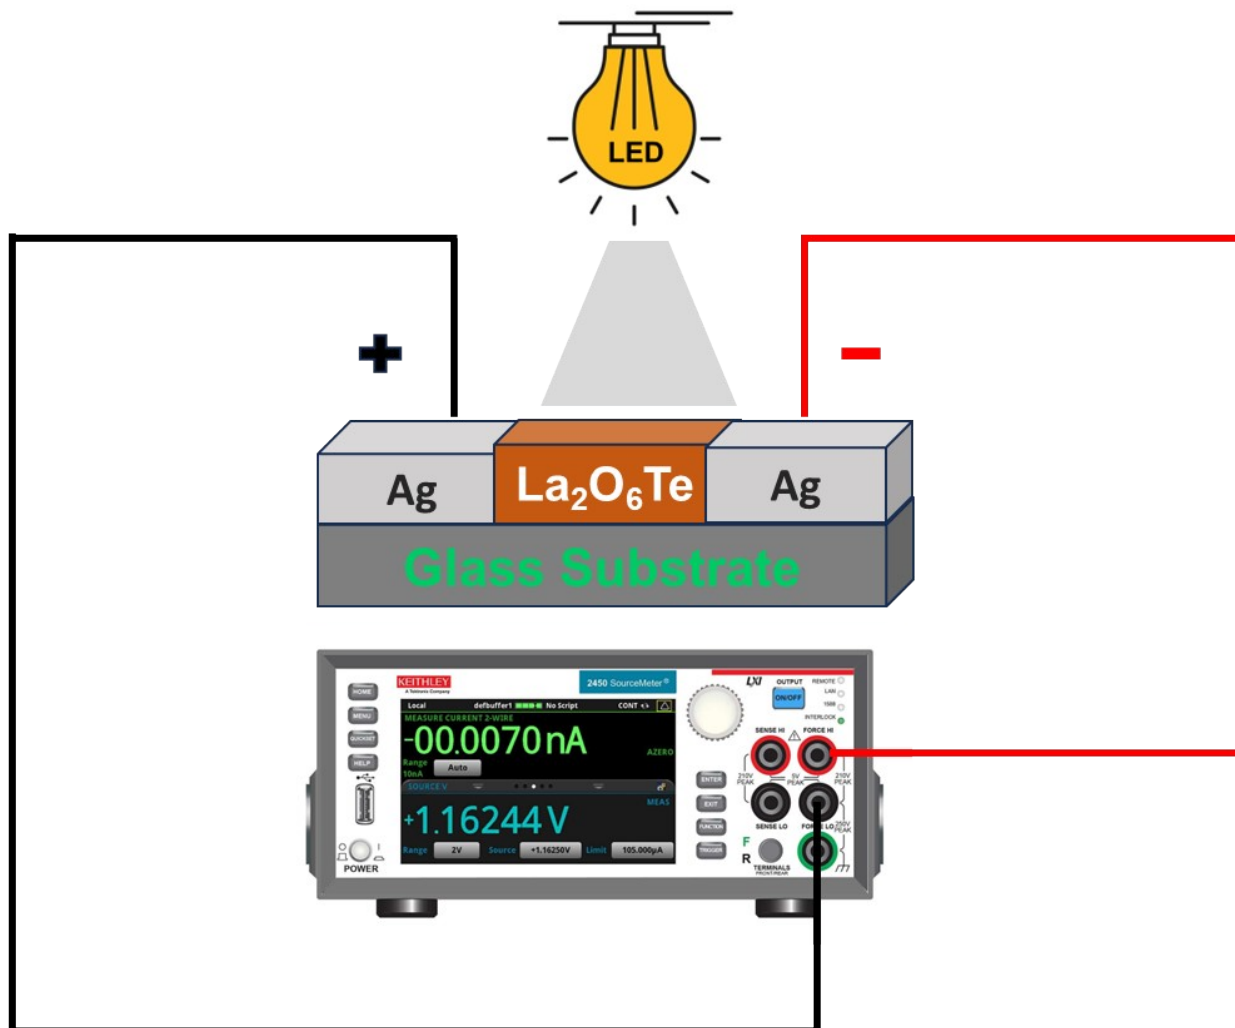

**Scheme S1.** Detailed photo detection measurement process of the fabricated PDs.

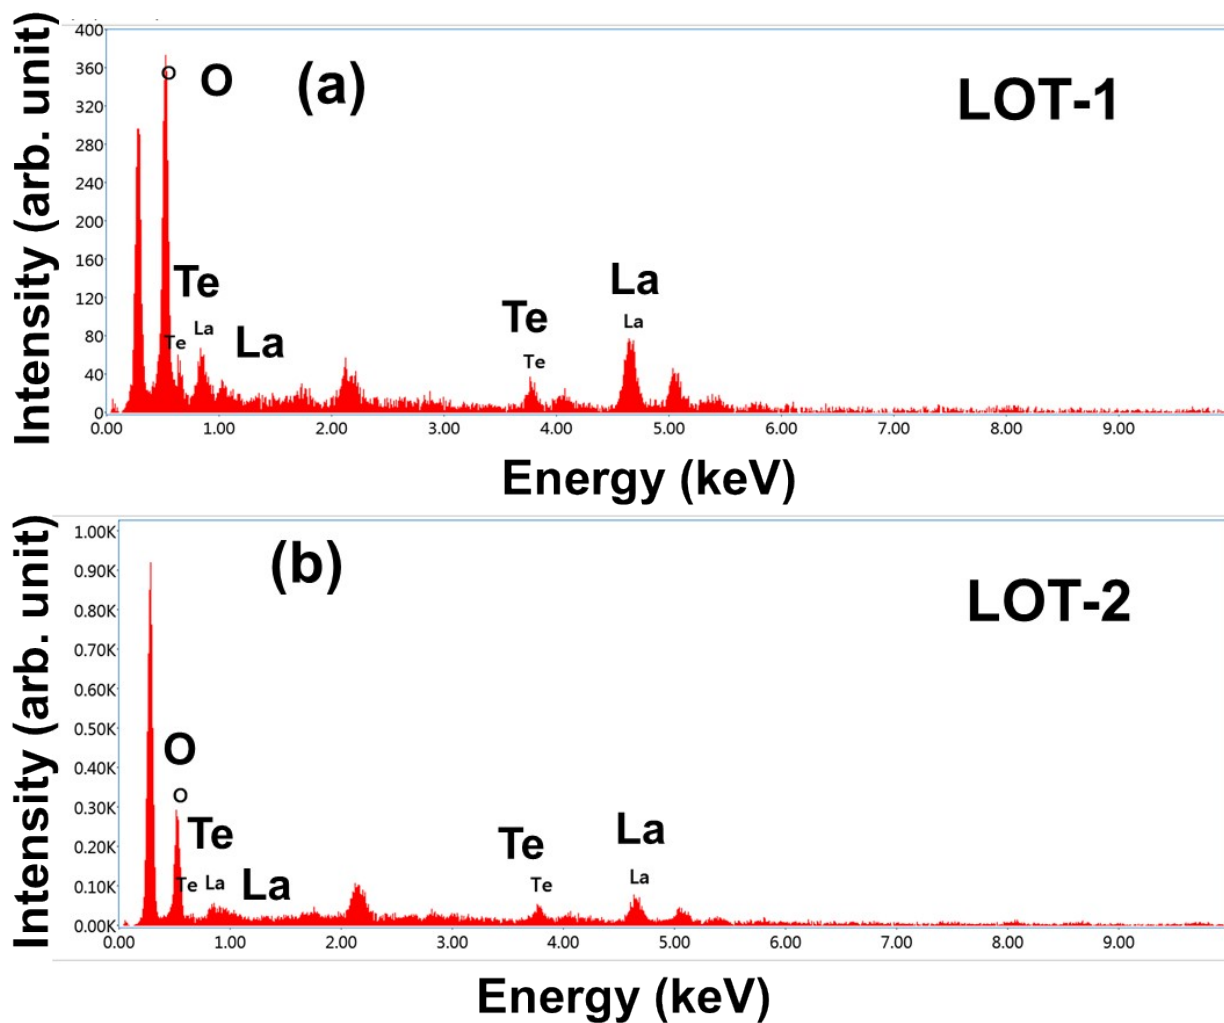

Fig. S1. EDX spectrum demonstrating the components present in each of the produced samples (a) LOT-1, and (b) LOT-2.

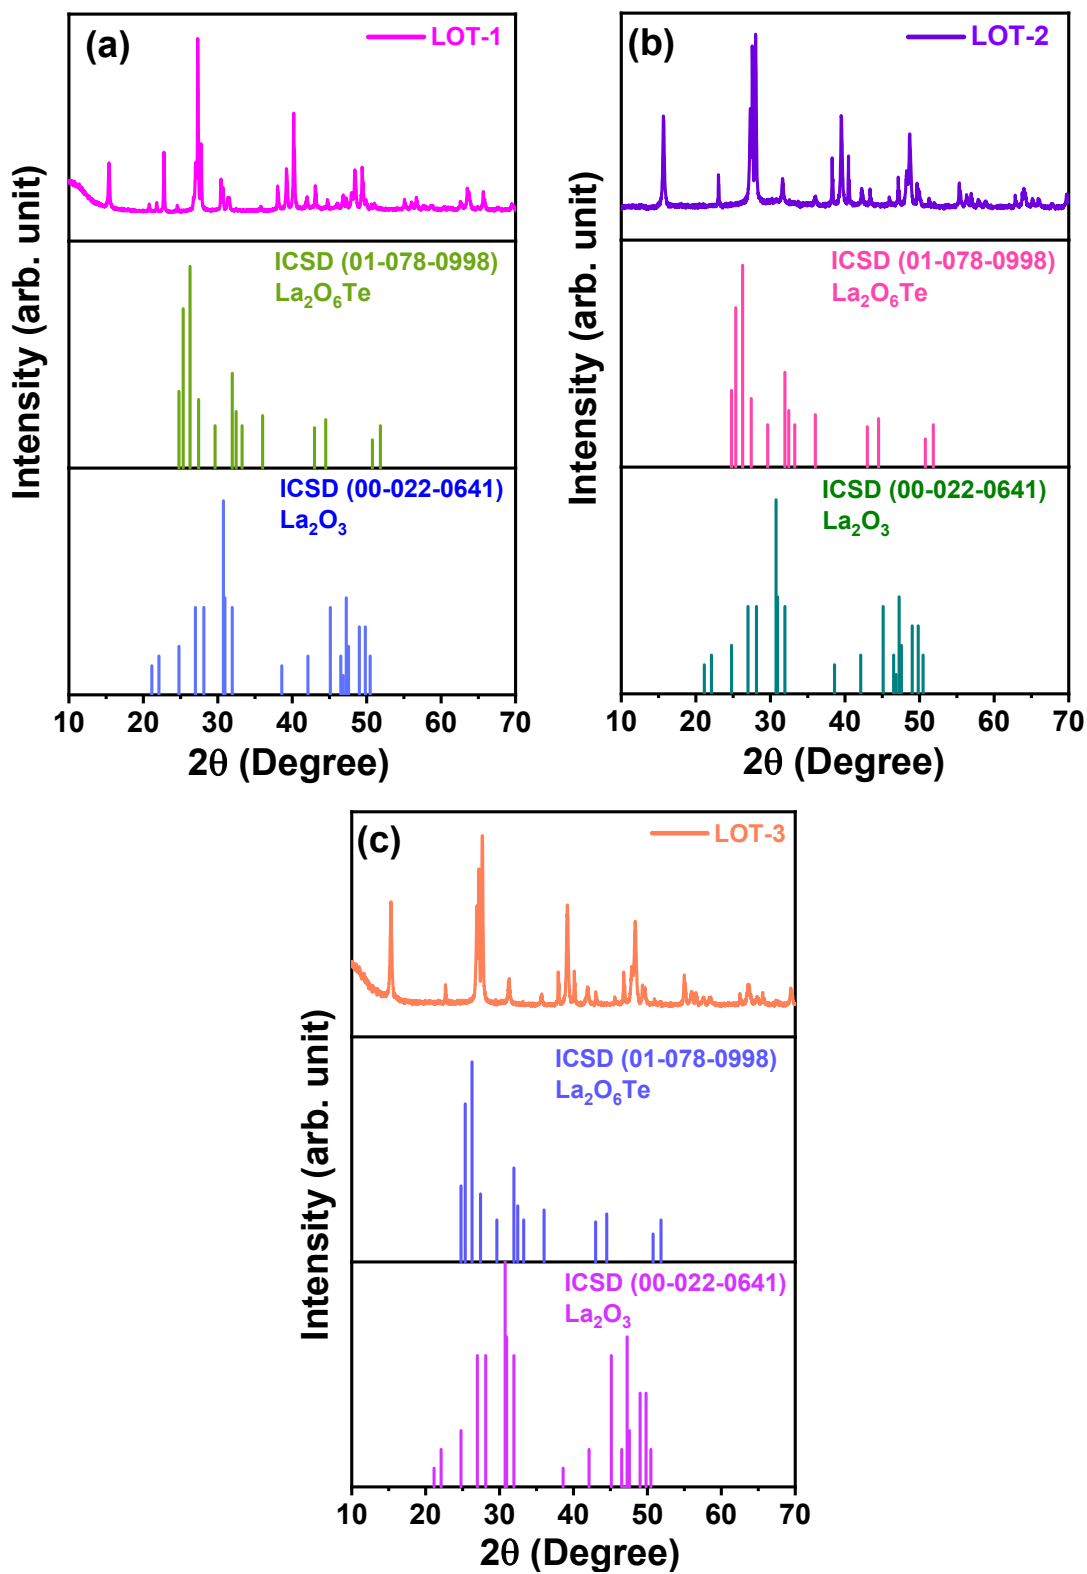

**Fig. S2.** XRD patterns of individual samples (a) LOT-1, (b) LOT-2 and (c) LOT-3 matched with the respective ICSD cards.

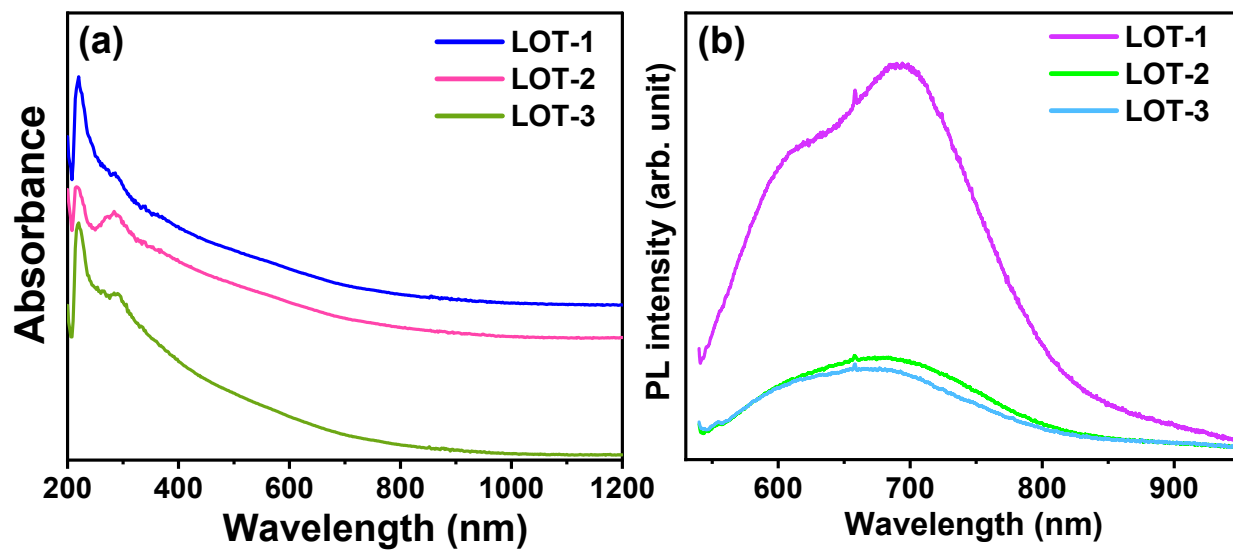

Fig. S3. (a) Absorbance spectra and (b) PL spectra of LOT samples.

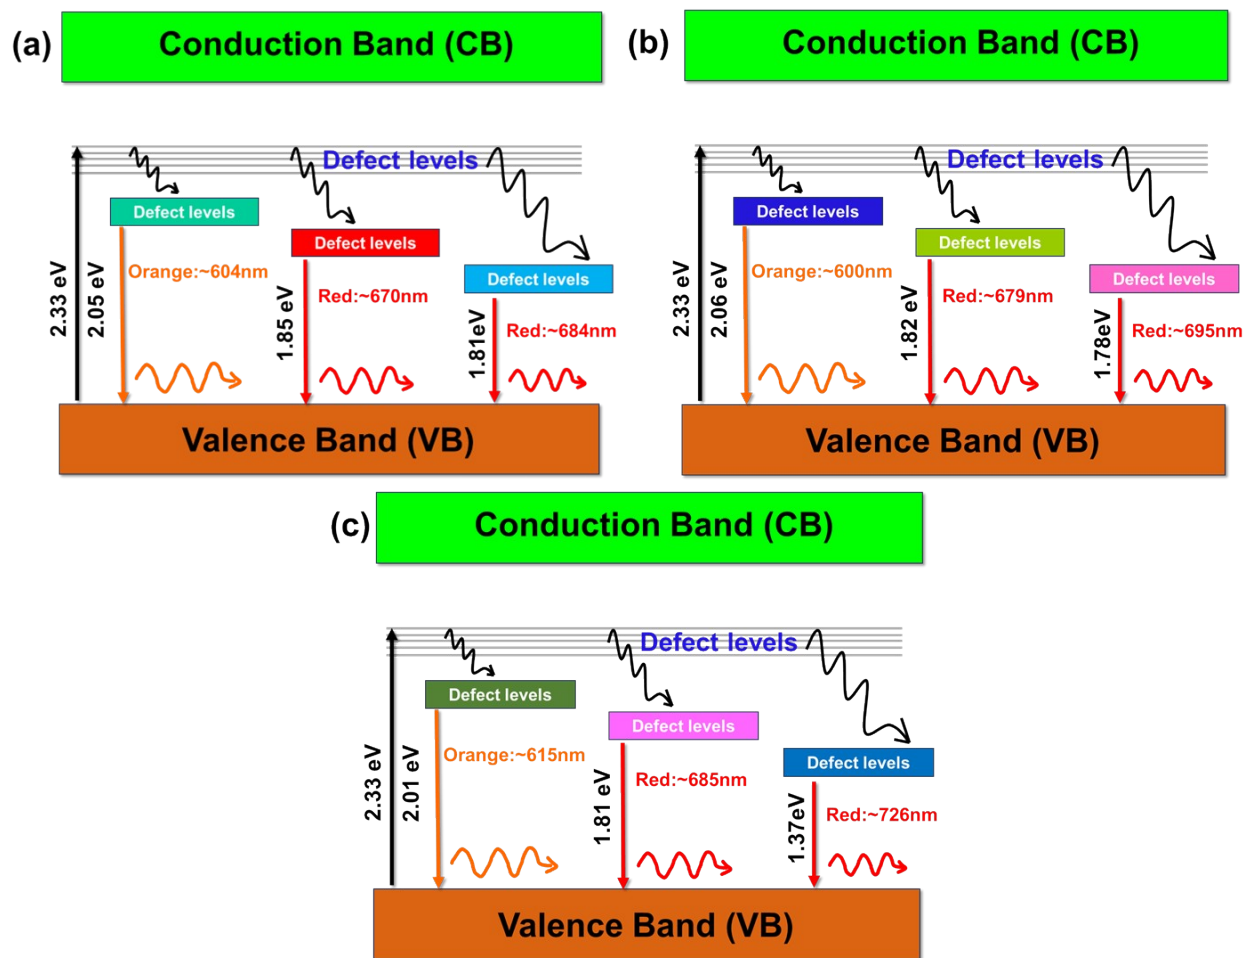

**Fig. S4.** Schematic illustration of the band gap diagram showing the defect energy states of (a) LOT-1, (b) LOT-2 and (c) LOT-3 samples.

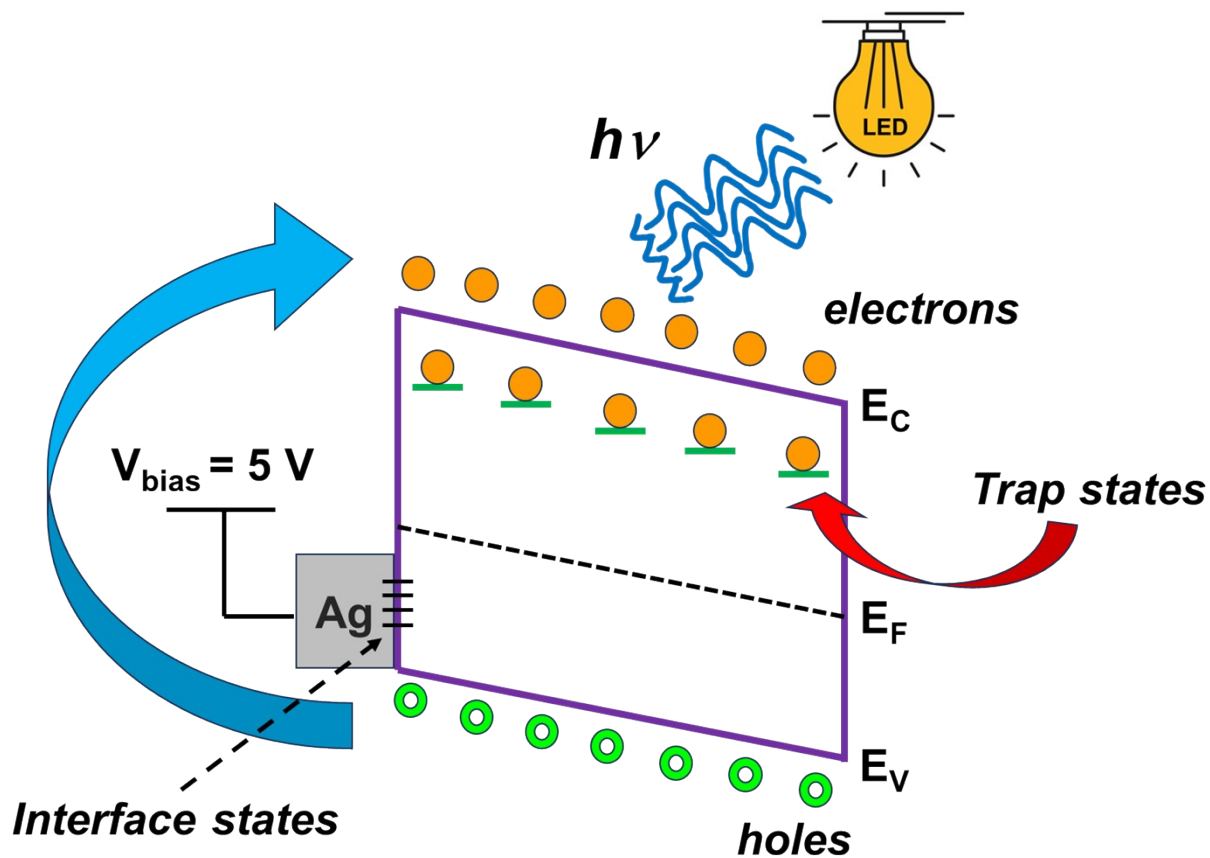

**Fig. S5.** Schematic diagram of the band structure representing the electron transport mechanism of LOT photodetection process.

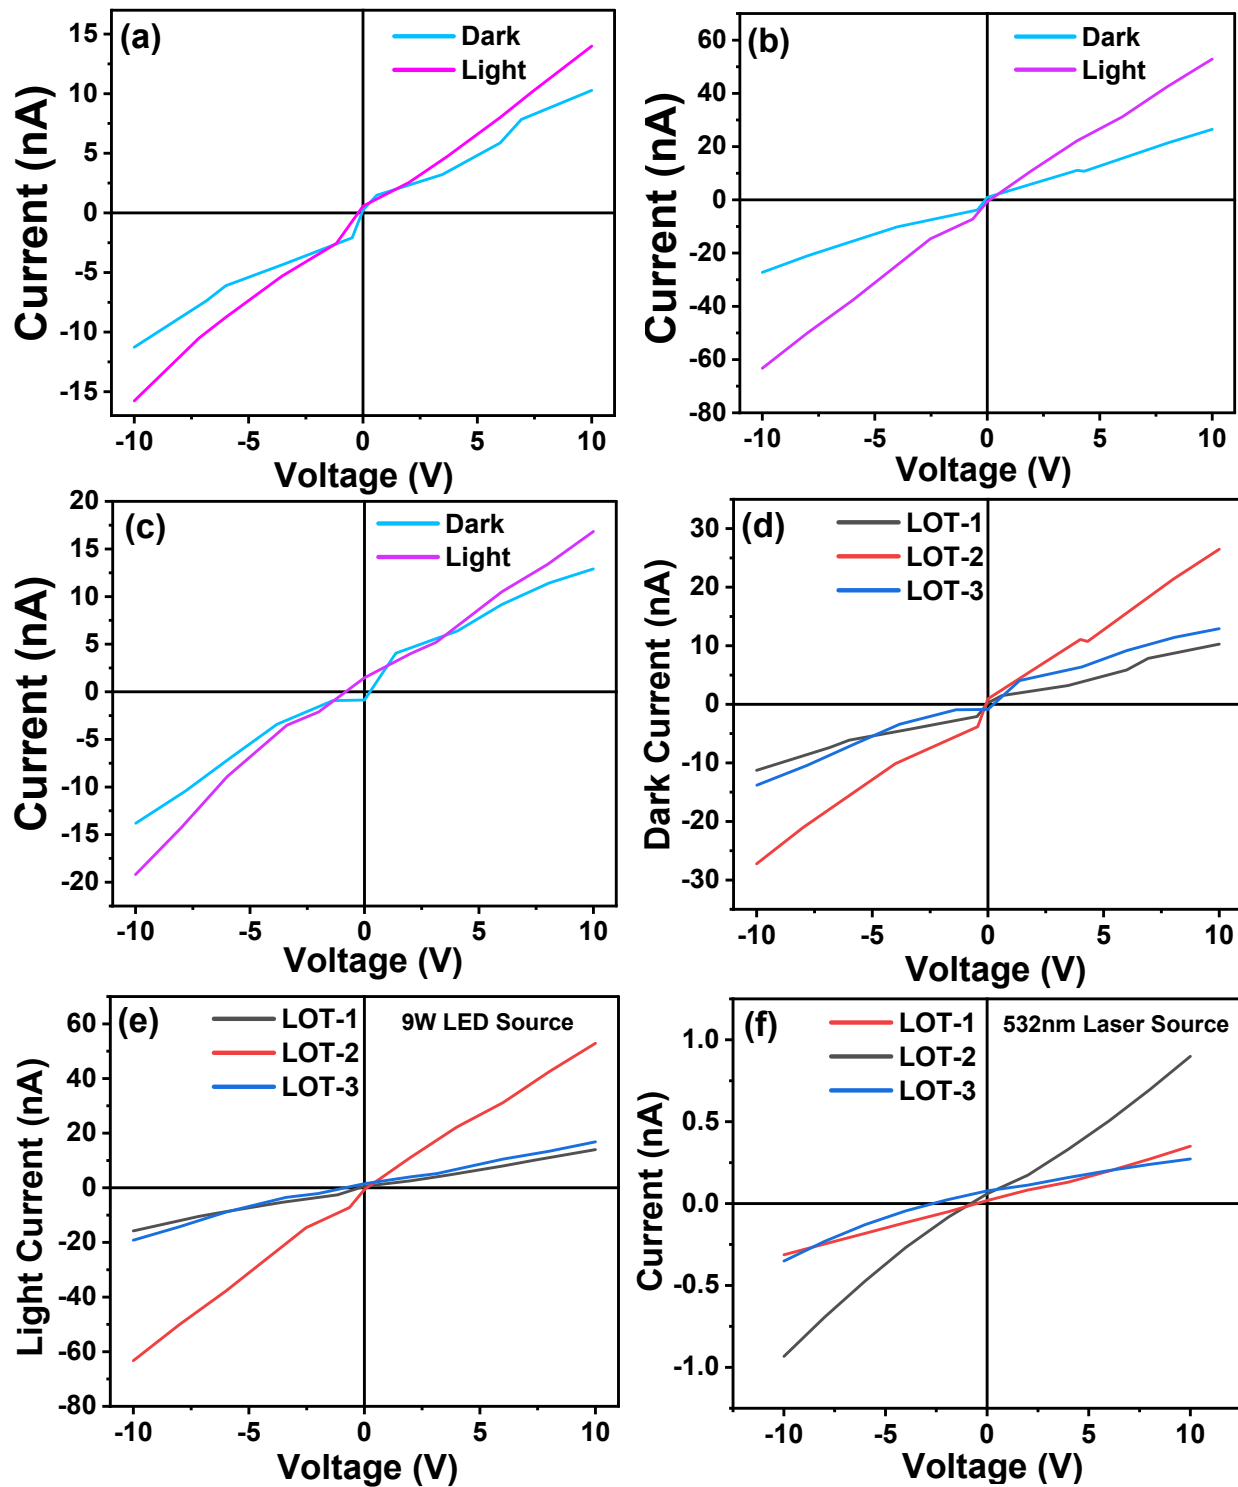

**Fig. S6.**  $I \sim V$  characteristic plots showing the combined plot of all the samples in (d) dark circumstances and (e) light conditions, with the linear y-axis of the individual PDs of the sample (a) LOT-1, (b) LOT-2, and (c) LOT-3, respectively.



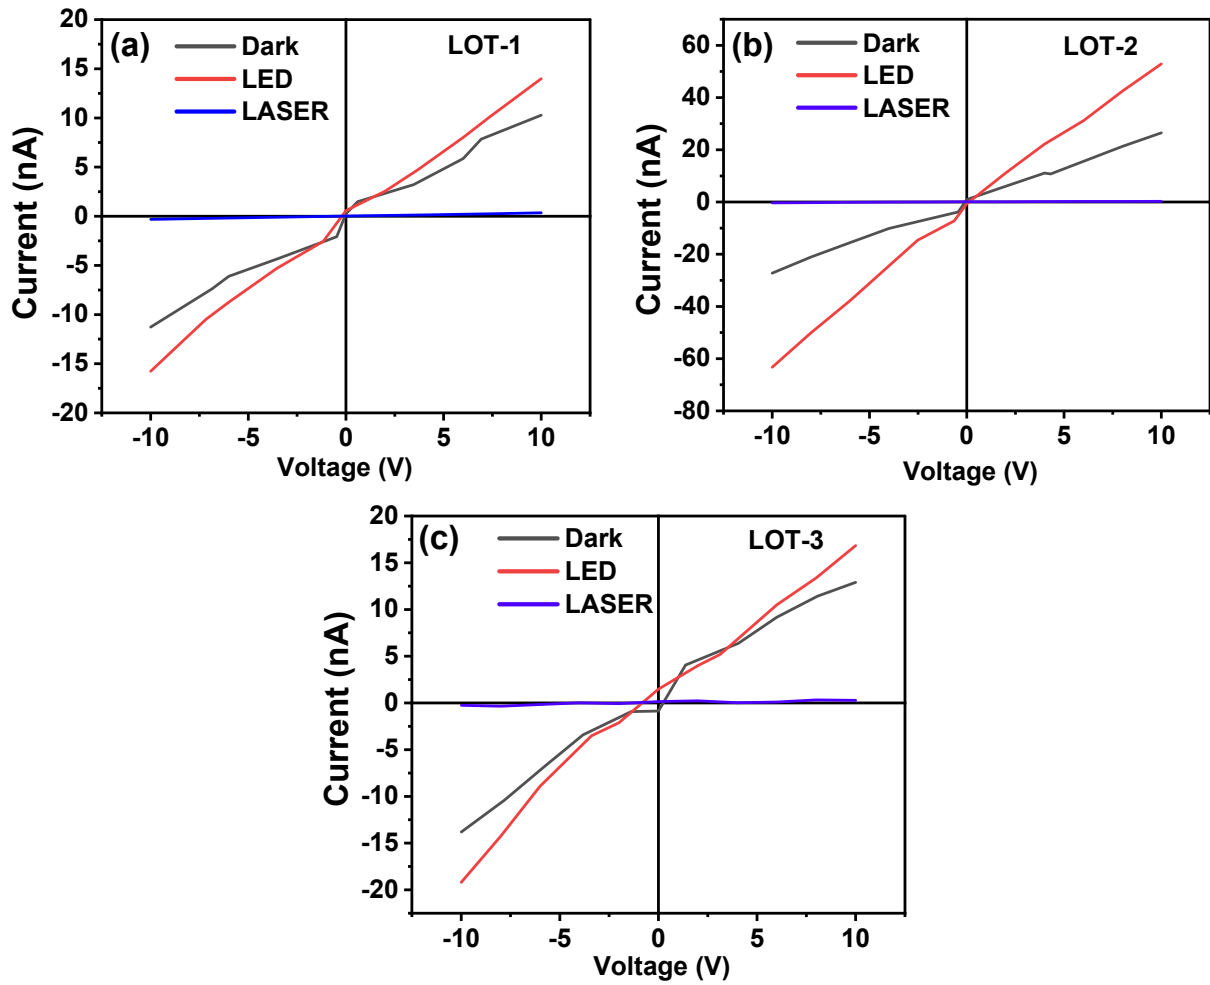

**Fig. S7.** I~V characteristics plots taken in dark, LED light and 532nm Laser light illumination conditions for (a) LOT-1, (b) LOT-2, and (c) LOT-3 samples.

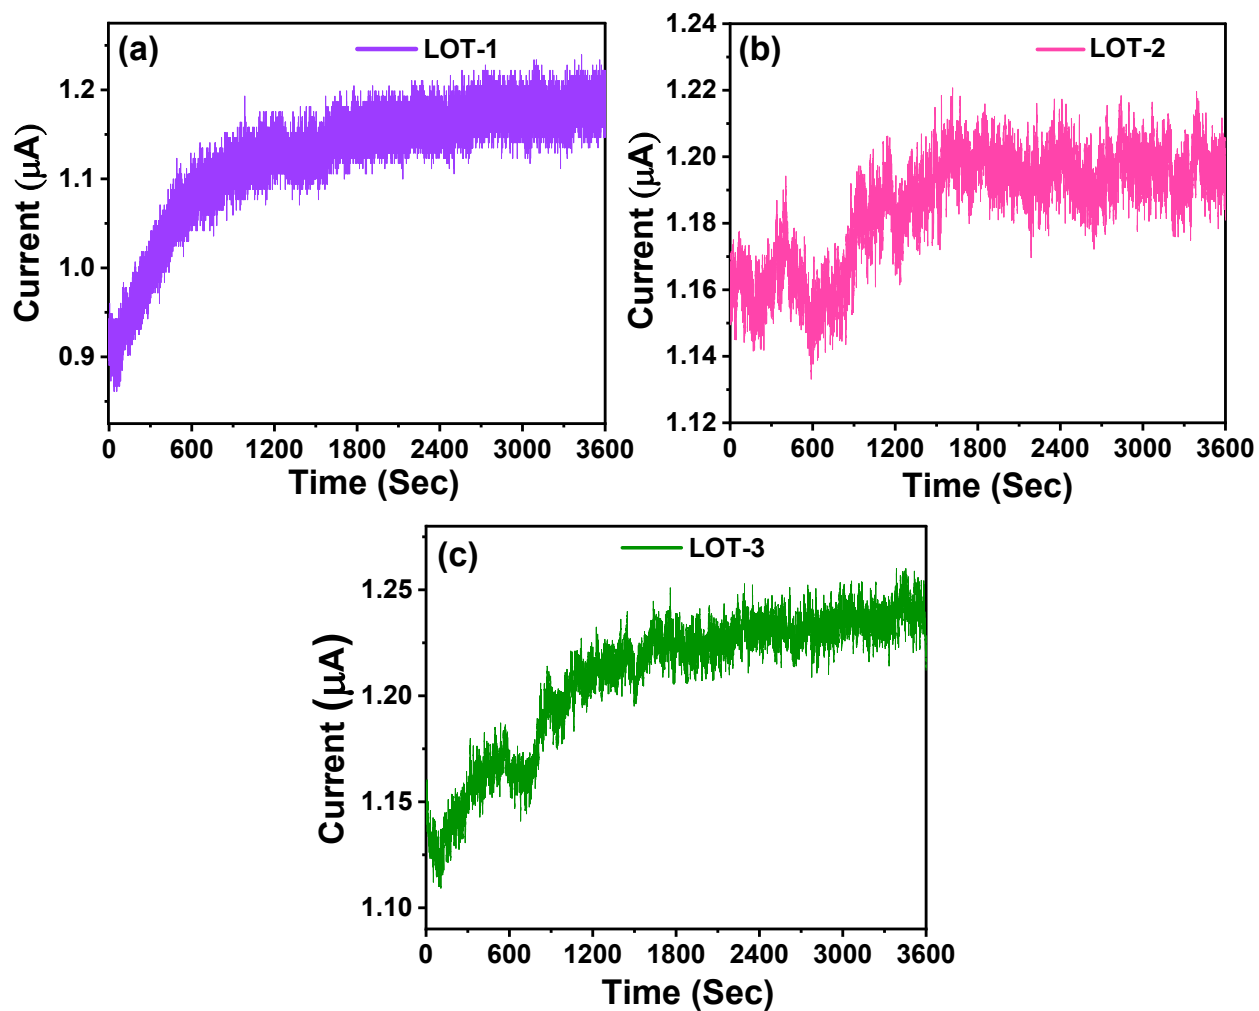

**Fig. S8.** I-T stability curve of (a) LOT-1, (b) LOT-2, and (c) LOT-3 samples taken for a period of 1 hour.

**Table S1.** Atomic percentage of various component elements of the samples.

| <b>Sample</b>  | <b>LOT-1</b> | <b>LOT-2</b> | <b>LOT-3</b> |
|----------------|--------------|--------------|--------------|
| <b>Element</b> | At. %        | At. %        | At. %        |
| <b>La</b>      | 76.82        | 75.32        | 78.73        |
| <b>O</b>       | 12.53        | 13.76        | 10.84        |
| <b>Te</b>      | 10.65        | 10.92        | 10.43        |
| <b>Total</b>   | 100.00       | 100.00       | 100.00       |

**Table S2.** A summary of the photodetector performances of the typical 2D materials.

| <b>Photodetector materials</b>    | <b>Wavelength (nm)</b> | <b>Responsivity (R) (AW<sup>-1</sup>)</b> | <b>Detectivity (D*) (Jones)</b> | <b>Refs.</b> |
|-----------------------------------|------------------------|-------------------------------------------|---------------------------------|--------------|
| Bi <sub>2</sub> O <sub>2</sub> S  | 850                    | $9.48 \times 10^{-3}$                     | $9.96 \times 10^{10}$           | 1            |
| Bi <sub>2</sub> O <sub>2</sub> Se | 300-900                | $3.712 \times 10^3$                       | $3.3 \times 10^{10}$            | 2            |
| Bi <sub>2</sub> O <sub>2</sub> Te | 210-2400               | $3 \times 10^5$                           | $4 \times 10^{15}$              | 3            |
| Bi <sub>2</sub> O <sub>5</sub> Te | 400-700 (Vis)          | $1.55 \times 10^{-4}$                     | $2.18 \times 10^{12}$           | 4            |
| GeP                               | 532                    | $\sim 10^{-4}$                            | $1.38 \times 10^7$              | 5            |
| O-doped BiI <sub>3</sub>          | 532                    | $0.23 \times 10^3$                        | $2.52 \times 10^{12}$           | 6            |
| La <sub>2</sub> O <sub>6</sub> Te | 400-700 (Vis)          | $10.64 \times 10^{-6}$                    | $5.8 \times 10^7$               | This work    |

**Table S3.** NLO parameters of different materials under performed with CW laser mode.

| <b>Sample Name</b>                | <b><math>\beta</math> (cm/W)</b> | <b><math>n_2</math> (cm<sup>2</sup>/W)</b> | <b><math>\chi^{(3)}</math> (e.s.u.)</b> | <b>References</b> |
|-----------------------------------|----------------------------------|--------------------------------------------|-----------------------------------------|-------------------|
| N-GO                              | $0.14 \times 10^{-6}$            | $5.75 \times 10^{-13}$                     | $3.25 \times 10^{-7}$                   | 7                 |
| GO                                | $2.1 \times 10^{-6}$             | $1.0203 \times 10^{-11}$                   | –                                       | 8                 |
| rGO                               | $9 \times 10^{-6}$               | $9.5549 \times 10^{-11}$                   | –                                       |                   |
| CDs                               | $2.513 \times 10^{-4}$           | $1.012 \times 10^{-8}$                     | $3.93 \times 10^{-7}$                   | 9                 |
| THBSM crystal                     | $2.014 \times 10^{-3}$           | $2.324 \times 10^{-7}$                     | $7.504 \times 10^{-5}$                  | 10                |
| CdTe                              | $1.4 \times 10^{-2}$             | $2.58 \times 10^{-7}$                      | –                                       | 11                |
| Red-ZnCdSeS                       | $2.25 \times 10^{-4}$            | $5.89 \times 10^{-12}$                     | $8.05 \times 10^{-14}$                  | 12                |
| La <sub>2</sub> O <sub>6</sub> Te | $3.798 \times 10^{-3}$           | $3.592 \times 10^{-8}$                     | $5.826 \times 10^{-3}$                  | This work         |

## Reference

1. P. Rong, S. Gao, M. Zhang, S. Ren, H. Lu, J. Jia, S. Jiao, Y. Zhang and J. Wang, *J. Alloys Compd.*, 2022, **928**, 167128.
2. X. Zou, R. Wang, Y. Sun and C. Wang, *J. Materiomics*, 2023, **9**, 10241031.
3. P. Tian, H. Wu, L. Tang, J. Xiang, R. Ji, S. P. Lau, K. S. Teng, W. Guo, Y. Yao and L.-J. Li, *J. Mater. Chem. C*, 2021, **9**, 13713–13721.
4. P.C. Kumar, G.K. Pradhan, S. Senapati, and R. Naik, *ACS Appl. Electron. Mater.*, 2024, **6**, 3311-3324.
5. T. Yu, H. Nie, S. Wang, B. Zhang, S. Zhao, Z. Wang, J. Qiao, B. Han, J. He, and X. Tao, *Adv. Opt. Mater.*, 2019, **8**, 1901490.
6. T. Tian, X. Song, Z. Liu, Z. Ma, B. Wang, B. Wang, X. Li, Y. Yan, Y. Jiang, S. Wei, and C. Xia, *J. Alloy. Compd.*, 2022, **917**, 165429.
7. K. Kumara, T. C. S. Shetty, S. R. Maidur, P. S. Patil and S. M. Dharmaprakash, *Optik*, 2019, **178**, 384-393.
8. K. Kumara, V. S. Kindalkar, F. J. Serrao, T. C. S. Shetty, P.S. Patil and S.M. Dharmaprakash, *Mater. Today Proc.*, 2022, **55**, 186-193.
9. S. Pandiyan, L. Arumugam, S. P. Srengan, R. Pitchan, P. Sevugan, K. Kannan, G. Pitchan, T. A. Hegde and V. Gandhirajan, *ACS omega*, 2020, **5**, 30363-30372.
10. A. Priyadharshini and S. Kalainathan, *J Mater Sci: Mater Electron*, 2017, **28**,7401–7412.
11. M. H. Majles Ara, Z. Moslemi, H. Naderi, A. Mihandoost, A. Daneshfar and R. Sahraei, *Applied Physics B*, 2015, **118**, 567-572.
12. Z. Moslemi, E. Soheyli, M. H. M. Ara and R. Sahraei, *J. Phys. Chem. Solids.*, 2018, **120**, 64-70.
